# Supplementary material
Source: PubMed Central journal article supplement (PMC6869542)
Supplement: HBM-36-4622-s001.pdf [file HBM-36-4622-s001.pdf]

## Supplementary material

### Negative childhood experiences alter a prefrontal-insular-motor cortical network in healthy adults: A preliminary multimodal rsfMRI-fMRI-MRS-dMRI study

Niall W. Duncan, Dave J. Hayes, Christine Wiebking, Brice Tiret, Karin Pietruska, David Q. Chen, Pierre Rainville, Malgorzata Marjańska, Omar Mohammad, Julien Doyon, Mojgan Hodaie, Georg Northoff

#### Supplementary figures

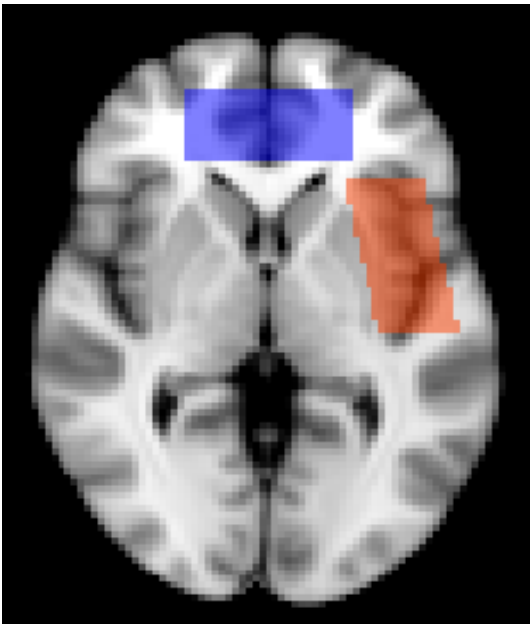

Supplementary figure 1: Location of MRS voxels. Blue – mPFC. Red – left insula

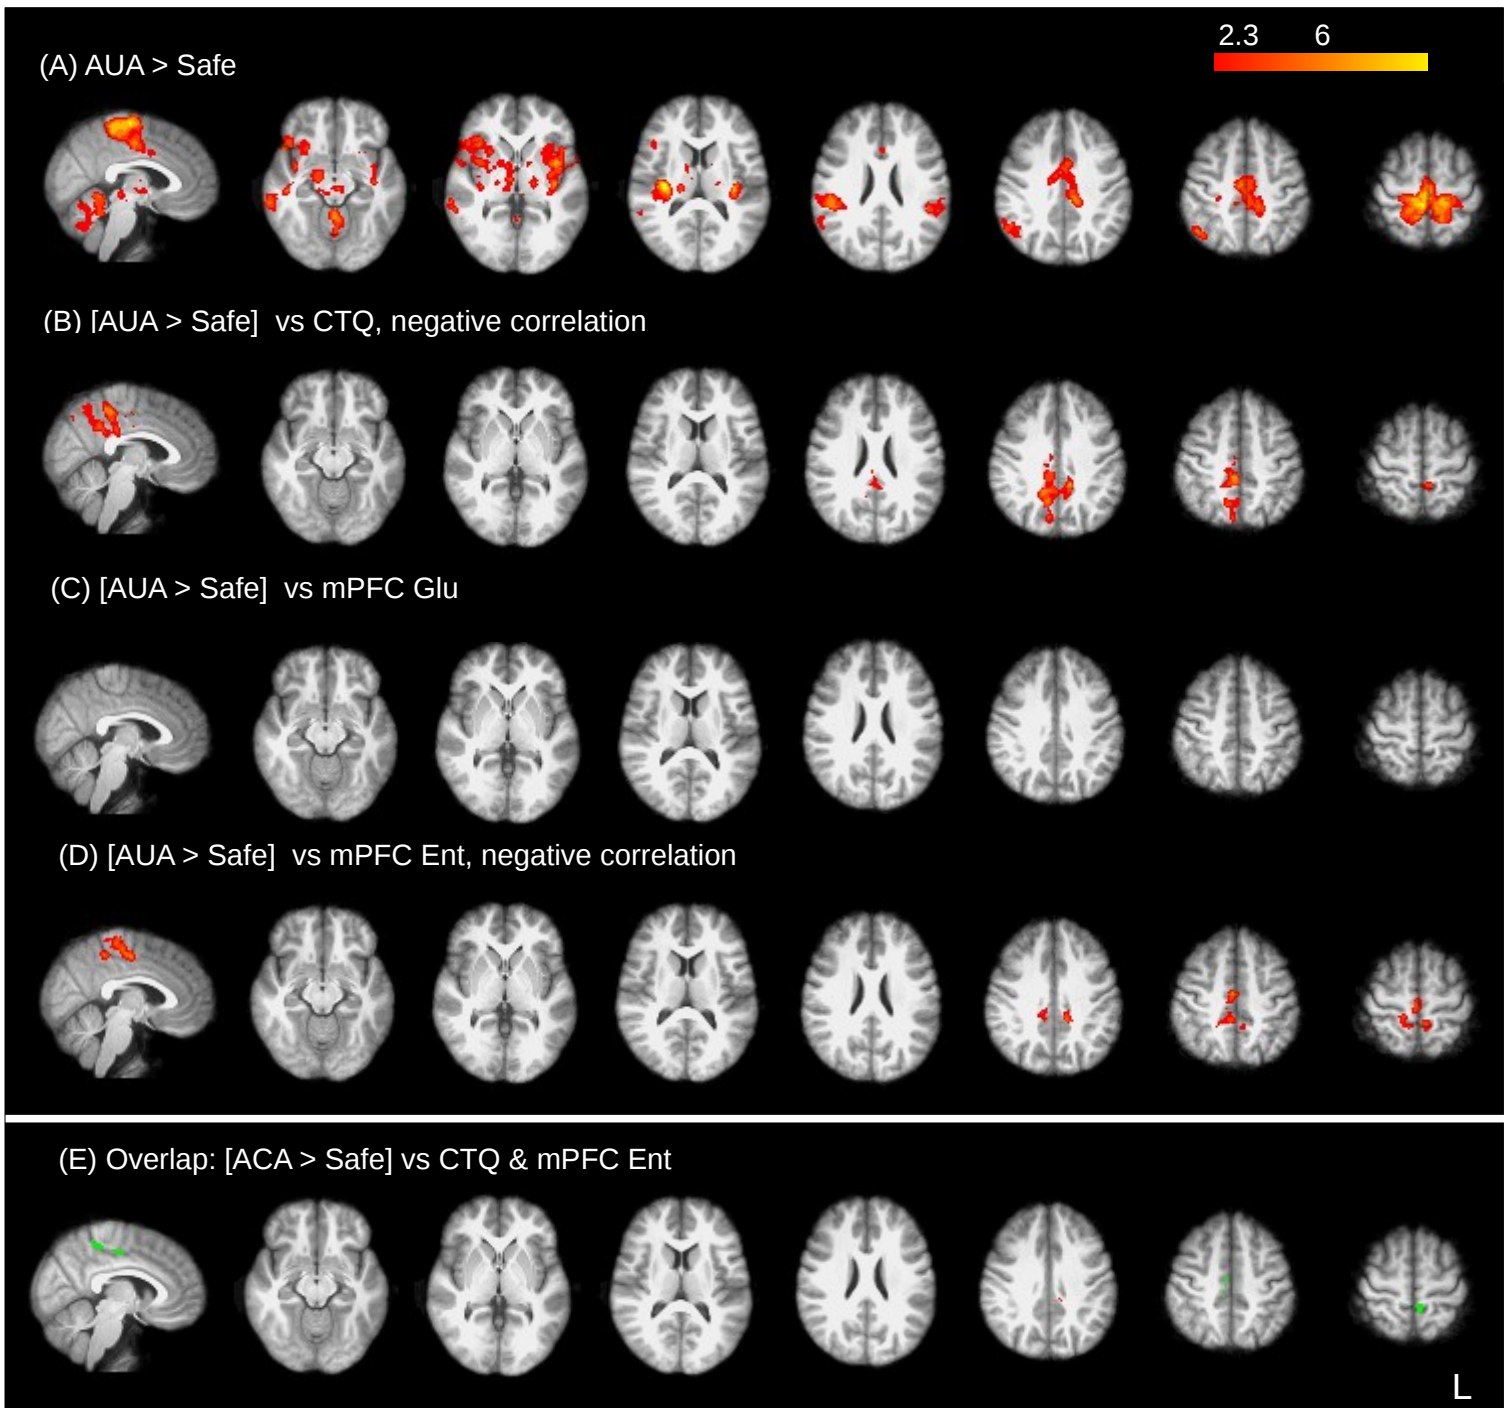

Supplementary figure 2: Figure 3: Brain maps showing (A) the basic contrast of the anticipation of uncertain aversion > safe [AUA > Safe]; (B) the negative correlation between [AUA > Safe] contrast values and CTQ scores; (C) the positive correlation between [AUA > Safe] contrast values and mPFC Glu; (D) the negative correlation between [AUA > Safe] contrast values and mPFC entropy; and (E) the overlap, in green, between each of these maps. Results are thresholded at  $p < 0.05$ , FWE corrected ( $n = 14$ ), other than [AUA > Safe] vs mPFC Glu which is thresholded at  $p < 0.005$ , uncorrected. Results are shown superimposed on the study mean anatomical image. Sagittal  $x = 6$ .

## Supplementary tables

|                    | Complete group (n = 25) | MRS+rest subgroup (n=12) |
|--------------------|-------------------------|--------------------------|
| Age                | 22 ± 3.9                | 23 ± 3.5                 |
| Sex                | 9F                      | 6F                       |
| Years in education | 13 ± 5.69               | 14 ± 3.93                |
| IQ                 | 113 ± 8.42              | 112 ± 9.33               |
| CTQ                | 36.9 ± 5.4              | 37 ± 5.1                 |
| ASI                | 14.3 ± 6.2              | 13.6 ± 6.6               |

Supplementary table 1: Subject demographics and test scores (mean ± S.D.). Values are given for the whole group as well as the subgroup for whom usable MRI data was available. IQ = estimated IQ (as measured using the Shipley Institute of Living Scale), CTQ = childhood trauma questionnaire, ASI = anxiety sensitivity index.

| Region               |     | x,y,z       | voxels | Z-max |
|----------------------|-----|-------------|--------|-------|
| post-insula/HG       | R   | 38 -20 12   | 22676  | 6.36  |
|                      | L   | -34 -22 14  |        |       |
| ant-insula/operculum | R   | 38 4 8      |        |       |
|                      | L   | 62 8 10     |        |       |
| POC                  | L   | -36 0 6     |        |       |
|                      | R   | -52 -4 6    |        |       |
| cerebellum           | L   | -48 -40 22  |        |       |
|                      | R   | 42 -28 18   |        |       |
| thalamus             | L/R | -6 -46 -22  |        |       |
|                      | L   | 0 -50 -12   |        |       |
| mid-insula           | L   | -18 -22 6   |        |       |
|                      | R   | -8 -20 -6   |        |       |
| post-SMG             | L   | 14 -14 -6   |        |       |
|                      | R   | -38 -8 -8   |        |       |
| VS                   | R   | 58 -30 30   |        |       |
|                      | L   | 20 8 -10    |        |       |
| amygdala             | L   | -12 0 0     |        |       |
|                      | R   | 14 4 -2     |        |       |
| SMC                  | R   | 14 8 -12    |        |       |
|                      | L   | 24 2 -16    |        |       |
| MCC/ACC              | R   | -18 -4 -16  | 11916  | 6.31  |
|                      | L   | 12 -40 72   |        |       |
| precuneus            | L   | 10 -16 72   |        |       |
|                      | R   | -16 -32 56  |        |       |
| PCC                  | L   | -6 -36 50   |        |       |
|                      | R   | -12 6 36    |        |       |
| MCC/SMA              | L/R | 6 4 36      |        |       |
|                      | L/R | -10 -48 58  |        |       |
| ACC                  | L/R | 0 -20 46    |        |       |
|                      | L/R | -10 -20 38  |        |       |
| paracingulate gyrus  | L/R | -2 -4 42    |        |       |
|                      | L/R | 4 22 18     |        |       |
| cerebellum           | L/R | 14 16 30    |        |       |
|                      | L/R | 6 14 52     |        |       |
| brain-stem           | L   | -20 -44 -52 | 257    | 5.09  |
| 1° MC                | L/R | -2 -36 -40  | 199    | 4.71  |
| 2° visual            | L   | -40 -10 48  | 195    | 4.22  |
|                      | L   | -38 -20 38  |        |       |
|                      | L/R | 22 -60 2    | 137    | 4.34  |
|                      | L/R | 22 -70 10   |        |       |

Supplementary table 2a: Results for contrast [ACA > Safe]. Coordinates are in MNI space. Significance threshold is  $p < 0.05$ , FWE corrected ( $Z > 2.3$ ). SMC = sensory-motor cortex; SMA = supplementary motor area; HG = Heschl's gyrus; 1° MC = primary motor cortex; 2° visual = secondary visual cortex; ACC = anterior cingulate cortex; POC = parietal operculum cortex; VS = ventral striatum; MCC = mid-cingulate cortex; ACC = anterior cingulate cortex; PCC = posterior cingulate cortex

| Region                                                       |     | x,y,z      | voxels | Z-max |
|--------------------------------------------------------------|-----|------------|--------|-------|
| SMC                                                          | R   | 10 -34 66  | 6317   | 4.9   |
|                                                              | L   | 22 -38 74  |        |       |
|                                                              |     | -14 -32 64 |        |       |
|                                                              |     | -18 -44 66 |        |       |
| MCC/SMA                                                      | L/R | 4 -14 44   |        |       |
|                                                              |     | 8 -6 36    |        |       |
| ACC                                                          | L/R | -2 20 24   |        |       |
| post-insula/HG<br>mid-temporal gyrus<br>ant-insula/operculum | R   | 36 -20 12  | 4830   | 4.92  |
|                                                              |     | 66 -36 -10 |        |       |
|                                                              |     | 48 20 -4   |        |       |
|                                                              |     | 38 28 0    |        |       |
|                                                              |     | 60 20 4    |        |       |
| thalamus                                                     | R   | 10 -12 -2  |        |       |
|                                                              | L   | -18 -24 -4 |        |       |
| mid-insula                                                   | R   | 38 4 0     |        |       |
|                                                              |     | 40 0 -12   |        |       |
| mid-brain                                                    | L/R | -6 -22 -10 |        |       |
|                                                              |     | 8 -28 -10  |        |       |
| VS                                                           | R   | 28 14 -2   |        |       |
|                                                              |     | 10 2 2     |        |       |
| mid-insula<br>post-insula<br>POC<br>ant-insula/operculum     | L   | -38 4 0    | 1938   | 4.15  |
|                                                              |     | -34 -24 14 |        |       |
|                                                              |     | -52 -32 20 |        |       |
|                                                              |     | -44 16 4   |        |       |
|                                                              |     | -36 4 -18  |        |       |
|                                                              |     | -60 8 0    |        |       |
| post-SMG<br>VS                                               |     | -50 -48 32 |        |       |
|                                                              |     | -16 6 6    |        |       |
| Cerebellum                                                   | L/R | 0-52 -8    | 1033   | 4.26  |
|                                                              |     | -8 -62 -42 |        |       |
|                                                              |     | 10 -66 -22 |        |       |
| Lat-OC<br>SMG                                                | R   | 48 -60 46  | 722    | 3.76  |
|                                                              |     | 60 -46 26  |        |       |

Supplementary table 2b: Results for contrast [AUA > Safe]. Coordinates are in MNI space. Significance threshold is  $p < 0.05$ , FWE corrected ( $Z > 2.3$ ). SMC = sensory-motor cortex; SMA = supplementary motor area; HG = Heschl's gyrus; 1° MC = primary motor cortex; 2° visual = secondary visual cortex; ACC = anterior cingulate cortex; POC = parietal operculum cortex; VS = ventral striatum; MCC = mid-cingulate cortex; ACC = anterior cingulate cortex; PCC = posterior cingulate cortex; lat-OC = lateral occipital cortex; post-SMG = posterior supramarginal gyrus

| Region                           |     | x,y,z      | voxels | Z-max |
|----------------------------------|-----|------------|--------|-------|
| SMC/PCC/precuneus/SMA            | L/R | -10 -24 76 | 3533   | 3.5   |
| post-SMG                         | R   | 56 -44 44  | 860    | 3.27  |
| dmPFC/ACC                        | R   | 10 52 28   | 526    | 3.3   |
| operculum/mid-insula/post-insula | L   | -46 -24 18 | 1365   | 3.35  |

Supplementary table 3a: Cluster locations for [ACA vs Safe] vs CTQ regression. Note that the thalamus cluster is mostly in the right thalamus. Coordinates are in MNI space. Threshold is  $p < 0.05$ , FWE corrected ( $Z > 2.3$ ). SMC = sensory-motor cortex; PCC = posterior cingulate cortex; SMA = supplementary motor area; Post-SMG = posterior supramarginal gyrus; dmPFC = dorsomedial prefrontal cortex; ACC = anterior cingulate cortex.

| Region        |     | x,y,z      | voxels | Z-max |
|---------------|-----|------------|--------|-------|
| PCC/precuneus | L/R | -10 -44 40 | 2222   | 3.35  |

Supplementary table 3b: Cluster locations for [AUA vs Safe] vs CTQ regression. Coordinates are in MNI space. Threshold is  $p < 0.05$ , FWE corrected ( $Z > 2.3$ ). PCC = posterior cingulate cortex.

| Region           |     | x,y,z      | voxels | Z-max |
|------------------|-----|------------|--------|-------|
| SMC              | L/R | 4 -16 50   | 133    | 3.4   |
| post-SMG         | L   | -64 -50 36 | 99     | 3.3   |
| Insula/operculum | L   | -44 2 8    | 67     | 3.36  |

Supplementary table 4: Cluster locations for [ACA vs Safe] vs mPFC Glu regression. Coordinates are in MNI space. Threshold is  $p < 0.005$ , uncorrected ( $k > 50$ ). SMC = sensory-motor cortex; Post-SMG = posterior supramarginal gyrus.

| Region               |     | x,y,z      | voxels | Z-max |
|----------------------|-----|------------|--------|-------|
| SMC/SMA              | L/R | -2 -18 52  | 933    | 4.18  |
| operculum/mid-insula | L   | -56 8 -4   | 627    | 3.73  |
| 1° MC                | L   | -38 -18 52 | 611    | 3.44  |

Supplementary table 5a: Cluster locations for [ACA vs Safe] vs mPFC Ent regression. Coordinates are in MNI space. Threshold is  $p < 0.05$ , FWE corrected ( $Z > 2.3$ ). SMC = sensory-motor cortex; SMA = supplementary motor area; 1° MC = primary motor cortex.

| Region            |     | x,y,z    | voxels | Z-max |
|-------------------|-----|----------|--------|-------|
| SMC/precuneus/PCC | L/R | 2 -16 50 | 1465   | 3.19  |

Supplementary table 5b: Cluster locations for [AUA vs Safe] vs mPFC Ent regression. Coordinates are in MNI space. Threshold is  $p < 0.05$ , FWE corrected ( $Z > 2.3$ ). SMC = sensory-motor cortex; PCC = posterior cingulate cortex.

| Sub | Mean fractional anisotropy |                          |                         |
|-----|----------------------------|--------------------------|-------------------------|
|     | Motor $\cap$ mPFC          | Motor $\cap$ In-<br>sula | mPFC $\cap$ In-<br>sula |
| 1   | 0.3140                     | 0.6012                   | 0.4616                  |
| 2   | 0.4650                     | 0.5383                   | 0.4574                  |
| 3   | 0.4634                     | 0.4168                   | 0.4780                  |
| 4   | 0.4686                     | 0.5111                   | 0.4659                  |
| 5   | 0.4702                     | 0.5079                   | 0.4456                  |
| 6   | 0.4923                     | 0.4474                   | 0.4295                  |
| 7   | 0.4617                     | 0.3731                   | 0.4008                  |
| 8   | 0.5135                     | 0.3940                   | 0.5157                  |
| 9   | 0.4638                     | 0.4780                   | 0.4569                  |
| 10  | 0.4454                     | 0.5213                   | 0.4712                  |
| 11  | 0.4611                     | 0.5376                   | 0.4798                  |

Supplementary table 6: Mean fractional anisotropy between ROIs for each participant.
